# Supplementary material for: Identification of a single amino acid in GluN1 that is critical for glycine-primed internalization of NMDA receptors
Source: PubMed Central journal article supplement (PMC3846451; doi:10.1186/1756-6606-6-36), 2013-08-13
Supplement: 1756-6606-6-36-S1.pdf [file 1756-6606-6-36-S1.pdf]

GluN1/GluN2A    GluN1/GluN2B

IP: Adaptin  $\beta$ 2

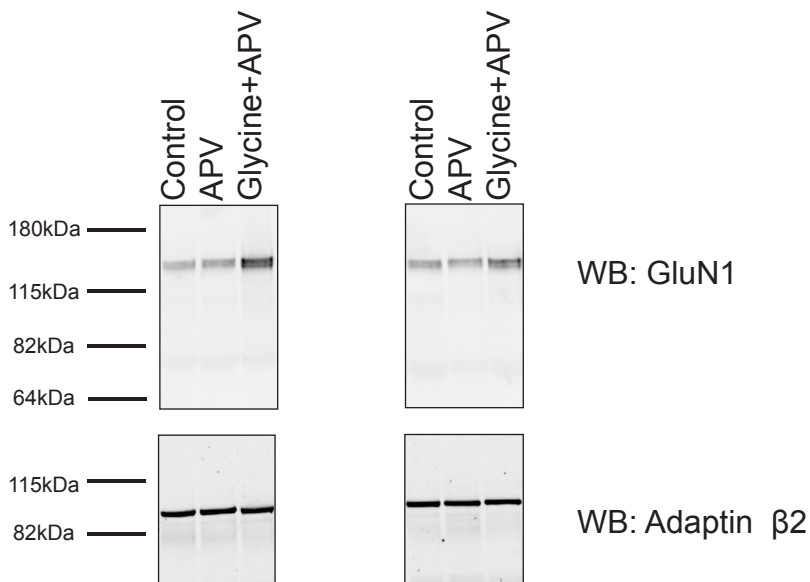

**Supplementary figure 1.** Treatment of HEK293 cells with 100  $\mu$ M glycine for 5min did not change level of association between GluN1 and Adaptin  $\beta$ 2 protein.
